# Supplementary material for: Characterization of Some Salt-Tolerant Bacterial Hydrolases with Potential Utility in Cultural Heritage Bio-Cleaning
Source: MDPI journal article supplement (doi:10.3390/microorganisms10030644), 2022-03-17
Supplement: s1 [file s1]

**Table S1.** The bacterial and fungal strains used in the present study and the accession numbers of their 16S rRNA/ITS gene sequence.

| Genus                     | Strain     | GenBank accession no. |
|---------------------------|------------|-----------------------|
| <i>Bacillus</i> sp.       | MM P1.8A   | MW036380              |
| <i>Bacillus</i> sp.       | AM N P1.17 | MW036408              |
| <i>Bacillus</i> sp.       | BA N P2.7  | MW036426              |
| <i>Bacillus</i> sp.       | BA N P1.2  | MW036436              |
| <i>Bacillus</i> sp.       | BA N P3.3  | OL454645              |
| <i>Bacillus</i> sp.       | BA N P3.8  | MW036437              |
| <i>Bacillus</i> sp.       | CB N P1.6  | MW036433              |
| <i>Bacillus</i> sp.       | BSL P2.1   | MW036388              |
| <i>Bacillus</i> sp.       | MM P2.8    | MW036378              |
| <i>Bacillus</i> sp.       | BA N P1.4  | MW036427              |
| <i>Virgibacillus</i> sp.  | BSL N P1.8 | MW036383              |
| <i>Salinivibrio</i> sp.   | CB P1.1    | MW036411              |
| <i>Salinivibrio</i> sp.   | MM N P1.3  | MW036396              |
| <i>Salinicoccus</i> sp.   | BSL N P1.1 | MW036374              |
| <i>Psychrobacter</i> sp.  | AM P2.5    | MW036416              |
| <i>Nocardiopsis</i> sp.   | BSL P1.X2  | MW036395              |
| <i>Penicillium</i> sp.    | BSL FP3.2  | OL454640              |
| <i>Penicillium</i> sp.    | MM FP1.4   | OL454639              |
| <i>Aspergillus</i> sp.    | BSL FP1.2  | OL454642              |
| <i>Aspergillus</i> sp.    | MM FP1.1   | OL454641              |
| <i>Emericellopsis</i> sp. | MM FP1.2   | OL454638              |

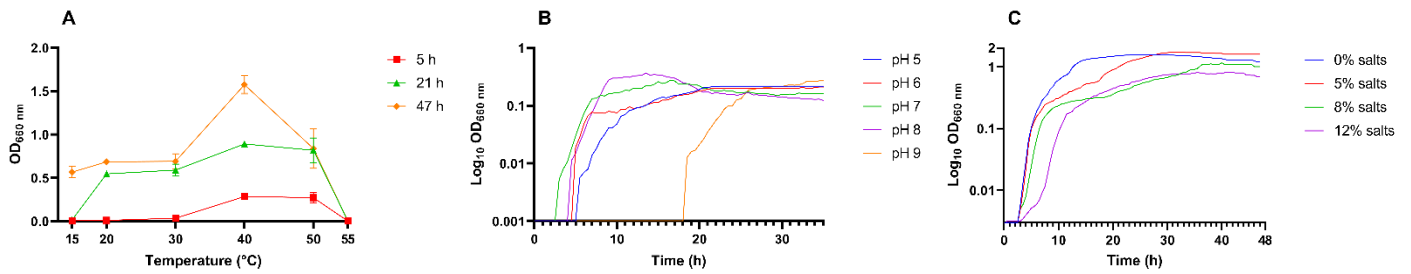

**Figure S1.** The effect of temperature (A), pH (B) and salt concentration (C) on the growth of *Bacillus* sp. AM N P1.17.

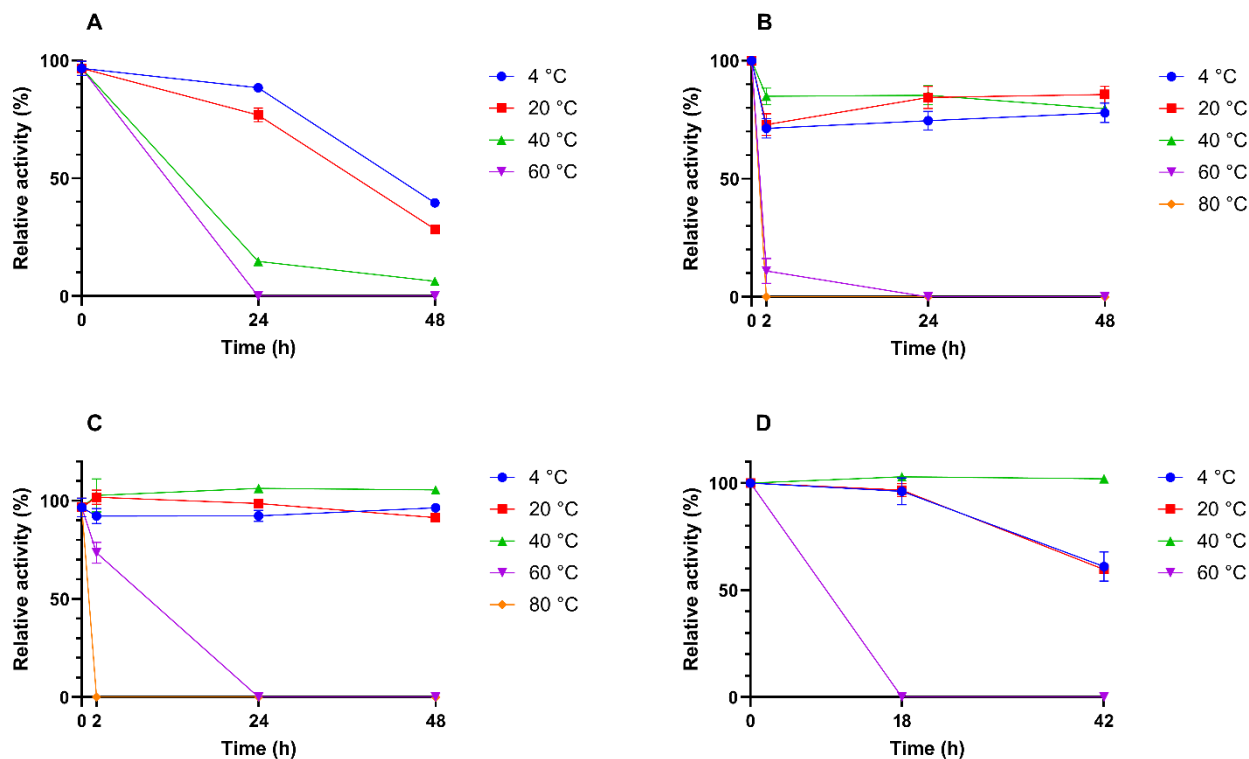

**Figure S2.** The effect of temperature on the stability of proteases (A), esterases (B), cellulases (C) and xylanases (D) produced by the selected strains of *Bacillus* sp.

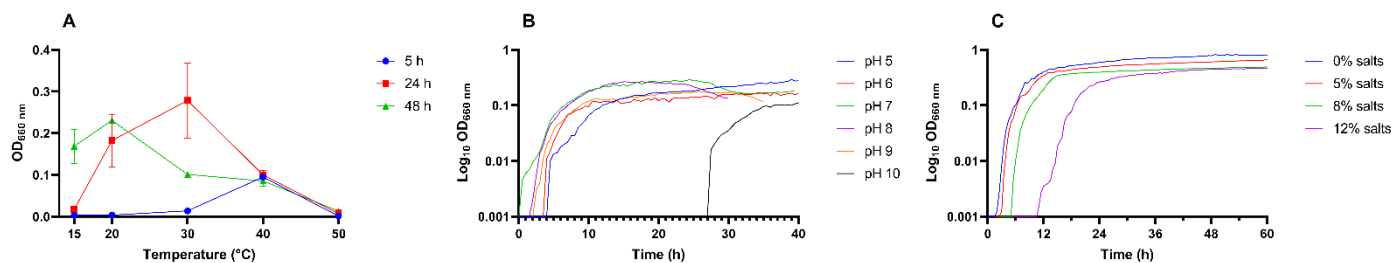

**Figure S3.** The effect of temperature (A), pH (B) and salt concentration (C) on the growth of *Bacillus* sp. BA N P3.3.

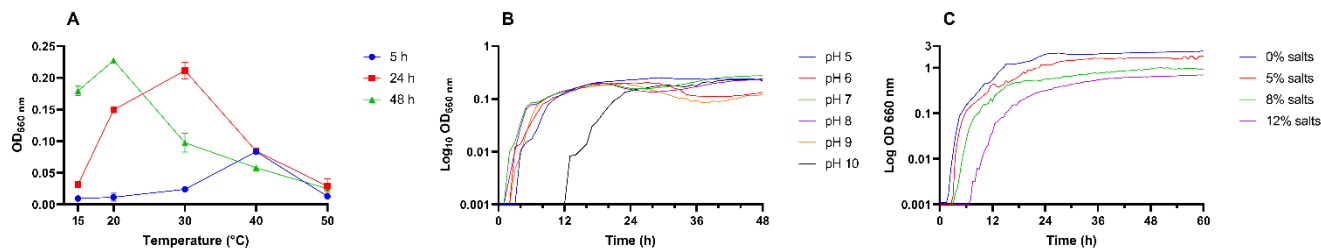

**Figure S4.** The effect of temperature (A), pH (B) and salt concentration (C) on the growth of *Bacillus* sp. BA N P1.4.

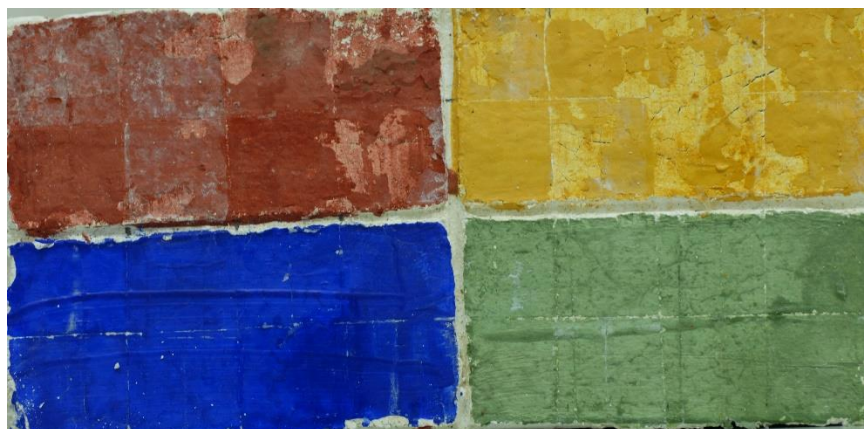

**Figure S5.** Oil-enriched laboratory model after the treatment with esterase.
